# Supplementary material for: Urinary iodine concentration and thyroid volume of pregnant women attending antenatal care in two selected hospitals in Ashanti Region, Ghana: a comparative cross-sectional study
Source: Springer Nature journal article supplement (doi:10.1186/s12884-018-1820-3), 2018-05-15
Supplement: MOESM1 [file 15765352]

**QUESTIONNAIRE FOR ASSESSING IODINE STATUS AND THYROID VOLUME IN PREGNANT WOMEN ATTENDING ANTENATAL CARE AT KNUST HOSPITAL OR EJURA DISTRICT HOSPITAL**

Date of interview \_\_\_\_/\_\_\_\_/\_\_\_\_

Identification code \_\_\_\_\_

***Please provide complete and sincere answers as possible. Tick the best option. All information will be treated in strict confidence.***

**I. Socio-demographics and pregnancy background**

- 1) Age (years)      ☐ < 20      ☐ 20-25      ☐ 26-30      ☐ 31-35  
                                 ☐ 36-40      ☐ > 40
- 2) Level of education      ☐ none      ☐ Primary      ☐ J.H.S.      ☐ S.H.S.  
                                         ☐ Tertiary
- 3) Trimester      ☐ 1st trimester      ☐ 2nd trimester      ☐ 3rd trimester
- 4) Number of pregnancies      ☐ < 3      ☐ 3-5      ☐ > 5
- 5) Number of stillbirths/abortions      ☐ < 3      ☐ 3-5      ☐ > 5

**II. Knowledge of use of iodised salt, sources of information on iodine utilisation and iodine deficiency disorders**

- 6) Have you heard about iodised salt? ☐ Yes      ☐ No
- 7) If yes, how did you learn about iodine utilisation?
- ☐ Posters/billboards      ☐ Flyers      ☐ Radio/television
- ☐ Health worker      ☐ School
- 8) Do you use iodised salt?      ☐ Yes      ☐ No
- 9) Do you take herrings and other ocean fish?
- ☐ Yes      ☐ No
- 10) Do you take iodine supplements? ☐ Yes      ☐ No
- 11) Have you heard about iodine deficiency disorders (IDDs)?
- ☐ Yes      ☐ No

**III. Knowledge of increased iodine requirement and effects of iodine deficiency during pregnancy, medical history and the use of tobacco**

- 12) Do you know that iodine requirements increase during pregnancy?  
[ ] Yes [ ] No
- 13) Do you know of the effects of iodine deficiency during pregnancy?  
[ ] Yes [ ] No
- 14) If yes, which of these effects do you know of?  
[ ] Mental retardation [ ] Cretinism [ ] Squinting  
[ ] Mutism [ ] Pregnancy goitre [ ] Miscarriage/stillbirth
- 15) Do you/have you had any thyroid disease? [ ] Yes [ ] No
- 16) Have you undergone thyroidectomy? [ ] Yes [ ] No
- 17) Are you on any thyroid medication? [ ] Yes [ ] No
- 18) Do you smoke? [ ] Yes [ ] No
